# Supplementary material for: You are what you eat: diet, health and the gut microbiota
Source: Springer Nature journal article supplement (doi:10.1038/s41575-018-0061-2), 2018-09-27
Supplement: 41575_2018_61_MOESM1_ESM.pdf [file 41575_2018_61_MOESM1_ESM.pdf]

# You are what you eat: diet, health and the gut microbiota

---

*Niv Zmora, Jotham Suez and Eran Elinav*

<https://doi.org/10.1038/s41575-018-0061-2>

| Supplementary table 1   Diet–microbiome–host interactions |          |                                   |                                                                                                                                                      |                                                                                                                          |                       |                                                         |
|-----------------------------------------------------------|----------|-----------------------------------|------------------------------------------------------------------------------------------------------------------------------------------------------|--------------------------------------------------------------------------------------------------------------------------|-----------------------|---------------------------------------------------------|
| Ref                                                       | Organism | Diet, nutrient or feeding pattern | Microbiota member(s)                                                                                                                                 | Phenotype                                                                                                                | Causative/associative | Method(s) of confirmation                               |
| 1                                                         | Mouse    | HFD, NC                           | Various bacteria                                                                                                                                     | Weight gain                                                                                                              | Causative             | GF mice                                                 |
| 2                                                         | Mouse    | HFD                               | Various bacteria ( <i>Down: Lactobacillus spp., Bifidobacterium spp., Bacteroides/Prevotella spp.</i> )                                              | Glucose intolerance, weight gain, adiposity                                                                              | Causative             | Antibiotics                                             |
| 3                                                         | Mouse    | HFD                               | Decrease in Bacteroides-like bacteria, Eubacterium rectale-Clostridium coccoides group and bifidobacteria                                            | Obesity, diabetes, insulin resistance                                                                                    | Associative           |                                                         |
| 4                                                         | Mouse    | HFD                               | Various bacteria                                                                                                                                     | Random plasma glucose and GTT                                                                                            | Causative             | FMT in GF mice                                          |
| 5                                                         | Mouse    | HFD                               | Up: Firmicutes, Down: Proteobacteria                                                                                                                 | Weight gain, increased adiposity                                                                                         | Associative           |                                                         |
| 6                                                         | Mouse    | HFD                               | Up: Firmicutes, <i>Ruminococcaceae, Rikenellaceae</i> ,<br>Down: Bacteroidetes, Proteobacteria, <i>Bacteroidaceae, Clostridiales, Prevotellaceae</i> | Weight gain, increased adiposity                                                                                         | Associative           |                                                         |
| 7                                                         | Mouse    | HFD                               | Down: Bacteroidetes, Up: Firmicutes, Proteobacteria                                                                                                  | Weight gain                                                                                                              | Causative             | KO model                                                |
| 8                                                         | Rat      | HFD                               | Up: Firmicutes, Down: Bacteroidetes                                                                                                                  | Hyperphagia, obesity                                                                                                     | Causative             | Antibiotics, FMT in GF mice, metabolite supplementation |
| 9                                                         | Mouse    | HFD                               | Down: <i>Akkermansia muciniphila</i>                                                                                                                 | Akkermanis reverses HFD-induced fat-mass gain, metabolic endotoxemia, adipose tissue inflammation and insulin resistance | Causative             | Administration of causative agent                       |
| 10                                                        | Mouse    | HFD                               | Up: <i>Desulfovibrio</i> , Down: <i>S24–7, Lachnospiraceae</i>                                                                                       | Exacerbated colitis                                                                                                      | Associative           |                                                         |
| 11                                                        | Mouse    | HFD                               | Up: Firmicutes, Deferribacteres, Down: Bacteroidetes, Actinobacteria, Proteobacteria                                                                 | (KO model) Increased energy expenditure and reduced weight gain                                                          | Causative             | FMT in GF mice                                          |

|    |              |                                  |                                                                                                                      |                                                                                      |             |                                                         |
|----|--------------|----------------------------------|----------------------------------------------------------------------------------------------------------------------|--------------------------------------------------------------------------------------|-------------|---------------------------------------------------------|
| 12 | Mouse        | parental HFD                     | Up: ratio Firmicutes/Bacteroidetes, <i>Lachnospiraceae</i> , Clostridiales                                           | Exacerbated infection, EAE and allergic sensitization                                | Causative   | Co-housing experiments                                  |
| 13 | Mouse        | HFD (+ parental HFD)             | Up: <i>Tenericutes</i> , <i>Verrucomicrobia</i> , Down: <i>Coriobacteriaceae</i> , <i>Peptococcaceae</i>             | Weight gain, fatty liver                                                             | Associative |                                                         |
| 14 | Mouse        | HFD + grape polyphenols          | Up: <i>Akkermansia muciniphila</i> , Down: Firmicutes/Bacteroidetes ratio                                            | Attenuated weight gain, adiposity, serum TNF, IL-6, LPS, glucose intolerance.        | Associative |                                                         |
| 15 | Mouse        | HFD + milk sphingomyelin         | Up: Firmicutes, <i>Bifidobacterium</i> , Down: Bacteroidetes, Actinobacteria                                         | Altered lipid metabolism genes, reduced serum LPS                                    | Associative |                                                         |
| 16 | Mouse        | HFD + FOS                        | Up: <i>Bifidobacterium</i>                                                                                           | Reduced endotoxemia and inflammatory cytokines, improved glycemic control            | Associative |                                                         |
| 17 | Mouse        | HFD + GOS                        | Up: <i>S24-7</i> , <i>Parabacteroides</i> , Down: <i>Coriobacteriaceae</i> , <i>Olsenella</i> , <i>Mucispirillum</i> | Modulation of HFD phenotype: serum triglycerides, plasma LPS, inflammatory cytokines | Associative |                                                         |
| 18 | Mouse        | HFD + wheat arabinoxylan         | Up: <i>Bacteroides/Prevotella</i> spp., <i>Roseburia</i> , <i>Bifidobacterium animalis lactis</i>                    | Ameliorated effects of HFD                                                           | Associative |                                                         |
| 19 | Human, mouse | HFD, feeding time-shifted        | Various bacteria                                                                                                     | Weight gain, glucose intolerance                                                     | Causative   | Antibiotics, FMT in GF mice                             |
| 20 | Mouse        | HFD, time-restricted feeding     | Down: <i>Lactobacillus</i> , <i>Lactococcus</i> , Up: <i>Oscillibacter</i>                                           | Weight gain, glucose intolerance, increased cholesterol levels                       | Associative |                                                         |
| 21 | Mouse        | NC, circadian clock manipulation | Various bacteria                                                                                                     | Elevated plasma TG, FFA, insulin and glucose                                         | Causative   | Antibiotics, GF mice, KO models, metabolite deprivation |
| 22 | Mouse        | HFD + vitamin D deficiency       | Up: <i>Helicobacter hepaticus</i> , Down: <i>Akkermansia muciniphila</i>                                             | Insulin resistance and NAFLD                                                         | Associative |                                                         |
| 23 | Human        | HFHSD                            | Various bacteria                                                                                                     | Obesity                                                                              | Causative   | FMT in GF mice                                          |

|    |       |                                 |                                                                                                                                                                                                     |                                                                                                  |                     |                             |
|----|-------|---------------------------------|-----------------------------------------------------------------------------------------------------------------------------------------------------------------------------------------------------|--------------------------------------------------------------------------------------------------|---------------------|-----------------------------|
| 23 | Human | HFHSD                           | Up: <i>Erysipelotrichi</i>                                                                                                                                                                          | Increased adiposity                                                                              | Causative           | FMT in GF mice              |
| 24 | Mouse | HFHSD                           | Up: Firmicutes, Down: Bacteroidetes                                                                                                                                                                 | Weight gain                                                                                      | Associative         |                             |
| 25 | Mouse | High-fat, high-cholesterol diet | Down: <i>Prevotella</i>                                                                                                                                                                             | Osteomyelitis                                                                                    | Causative (inverse) | Antibiotics, FMT in GF mice |
| 26 | Mouse | HFHSD + FOS                     | Up: Bacteroidetes, Down: Firmicutes                                                                                                                                                                 | Elevated propionate and butyrate, IGF activation, reduced weight gain, improved glycemic control | Causative           | Metabolite supplementation  |
| 27 | Mouse | HFHSD + cranberry extract       | Up: <i>Akkermansia</i> spp.                                                                                                                                                                         | Reduced weight gain, adiposity, improved insulin sensitivity, glucose tolerance                  | Associative         |                             |
| 28 | Mouse | Western diet                    | Up: <i>Mollicutes</i>                                                                                                                                                                               | Increased adiposity                                                                              | Causative           | FMT in GF mice              |
| 29 | Human | Caloric restriction             | Up: <i>Akkermansia muciniphila</i>                                                                                                                                                                  | Improved Disse index, reduced total and LDL cholesterol, decrease in waist circumference         | Associative         |                             |
| 30 | Human | Caloric restriction             | Down: <i>Clostridium histolyticum</i> , <i>Eubacterium rectale</i> / <i>Clostridium coccoides</i> , <i>Clostridium lituseburense</i> , Up: <i>Bacteroides</i> / <i>Prevotella</i>                   | Weight loss                                                                                      | Associative         |                             |
| 31 | Human | Caloric restriction             | Increase in <i>Bacteroides fragilis</i> , <i>Clostridium leptum</i> , <i>Bifidobacterium catenulatum</i> , decrease in <i>Clostridium coccoides</i> , <i>Lactobacillus</i> , <i>Bifidobacterium</i> | Weight loss                                                                                      | Associative         |                             |
| 32 | Human | Caloric restriction             | Down: Actinobacteria, Up: Bacteroidetes (among other)                                                                                                                                               | Weight loss, insulin sensitivity                                                                 | Associative         |                             |
| 33 | Mouse | Caloric restriction             | Up: <i>Lactobacillus</i>                                                                                                                                                                            | Prolonged lifespan, decreased body weight and adiposity, improved metabolic profile              | Associative         |                             |

|    |       |                                                           |                                                                                                                                                                                       |                                                                      |                       |                                                         |
|----|-------|-----------------------------------------------------------|---------------------------------------------------------------------------------------------------------------------------------------------------------------------------------------|----------------------------------------------------------------------|-----------------------|---------------------------------------------------------|
| 34 | Mouse | High-fiber diet                                           | Up: <i>Bacteroidaceae</i> , <i>Bifidobacteriaceae</i>                                                                                                                                 | Decreased susceptibility allergic airway inflammation, elevated SCFA | Causative             | Metabolite supplementation                              |
| 35 | Mouse | High-fiber diet                                           | Down: <i>Bacteroidiaceae</i>                                                                                                                                                          | Chemically-induced colitis                                           | Causative (inverse)   | FMT in GF mice, metabolite supplementation              |
| 36 | Human | high-fibre diet                                           | Up: <i>Coprococcus</i> , <i>Prevotella</i> and <i>Catenibacterium</i>                                                                                                                 | Frailty in elderly                                                   | Associative (inverse) |                                                         |
| 37 | Mouse | AhR ligands (cruciferous vegetables)                      | (in KO model) Up: Bacteroidetes phylum, bacterial load                                                                                                                                | Exacerbated colitis                                                  | Associative (inverse) | KO model, metabolite supplementation and deprivation    |
| 38 | Human | Fiber-deprived diet                                       | Up: <i>Akkermansia muciniphila</i> , <i>Bacteroides caccae</i> ,<br>Down: <i>Bacteroides ovatus</i> , <i>Eubacterium rectale</i>                                                      | Mucus degradation, susceptibility to infection, weight loss          | Causative             | FMT in GF mice                                          |
| 39 | Mouse | Flavonoids                                                | Various bacteria                                                                                                                                                                      | Accelerated weight regain                                            | Causative (inverse)   | Antibiotics, FMT to GF mice, metabolite supplementation |
| 40 | Human | Grain supplementation                                     | Up: Firmicutes/Bacteroidetes ratio, <i>Blautia</i> , <i>Bifidobacterium</i> , <i>Dialister</i> , <i>Eubacterium rectale</i> , <i>Roseburia faecis</i> , <i>Roseburia intestinalis</i> | Reduced plasma IL-6, reduced postprandial glucose                    | Associative           |                                                         |
| 41 | Mouse | Low carbohydrate diet                                     | Down: <i>Clostridiaceae</i> , <i>Lachnospiraceae</i> , <i>Ruminococcaceae</i> , <i>Coprococcus</i> , <i>Roseburia</i> , <i>Anaerotruncus</i>                                          | Reduced polyp frequency in CRC susceptible mice, reduced butyrate    | Associative           |                                                         |
| 42 | Human | Low-fat, high carbohydrate-diet, high glycemic index-diet | Up: <i>Bifidobacterium</i> , <i>Bacteroides</i>                                                                                                                                       | Weight loss, reduced fasting glucose and cholesterol                 | Associative           |                                                         |
| 43 | Human | Malawian diet                                             | Up: Caudovirales order, <i>Inoviridae</i> family                                                                                                                                      | Weight loss                                                          | Causative             | FMT in GF mice                                          |
| 44 | Human | Malawian diet + bovine milk oligosaccharides              | 25 distinct strains derived from Malawian microbiota                                                                                                                                  | Anabolism in infancy                                                 | Causative             | FMT in GF mice and piglets                              |

|    |              |                                          |                                                                                                                                                                                                              |                                                                                                                       |                     |                                               |
|----|--------------|------------------------------------------|--------------------------------------------------------------------------------------------------------------------------------------------------------------------------------------------------------------|-----------------------------------------------------------------------------------------------------------------------|---------------------|-----------------------------------------------|
| 45 | Human        | Malawian diet                            | Up: <i>Bilophila wadsworthia</i> , members of <i>Desulfovibrio</i> , <i>Clostridium innocuum</i>                                                                                                             | Weight loss                                                                                                           | Causative           | FMT in GF mice                                |
| 45 | Human        | Malawian diet + therapeutic food         | Up: <i>Bifidobacterium</i> , <i>Lactobacillus</i> , <i>Ruminococcus</i> , <i>Faecalibacterium prausnitzii</i> , Down: Bacteroidales                                                                          | Weight gain                                                                                                           | Associative         |                                               |
| 46 | Mouse        | Malnutrition + inulin                    | Up: <i>Lactobacillus</i>                                                                                                                                                                                     | Ameliorate giardiasis                                                                                                 | Associative         |                                               |
| 47 | Human        | Dietary emulsifiers                      | Up: Proteobacteria, <i>Enterobacteriaceae</i> , Down: <i>Bacteroidaceae</i>                                                                                                                                  | Elevated fasting glucose, LPS, faecal Lcn2 levels, shortened thickened colons, mild splenomegaly, increased adiposity | Causative           | FMT in GF mice                                |
| 48 | Mouse        | Dietary emulsifiers                      | Down: Bacteroidales, Up: <i>Ruminococcus gnavus</i> ; Up: <i>Akkermansia muciniphila</i> in IL10 KO mice                                                                                                     | Low-grade inflammation and adiposity                                                                                  | Causative           | FMT in GF mice                                |
| 49 | Human, mouse | NAS                                      | Up: Bacteroidales, <i>Bacteroides</i> , Down: Clostridiales, <i>Clostridium</i>                                                                                                                              | Glucose intolerance, elevated acetate and propionate                                                                  | Causative           | Antibiotics, FMT in GF mice, in vitro culture |
| 50 | Mouse        | Sucralose                                | Down: <i>Clostridium</i> cluster XIVa                                                                                                                                                                        | Increased hepatic cholesterol and cholic acid, luminal butyrate and secondary/primary bile acids ratio                | Associative         |                                               |
| 51 | Mouse        | Saccharin                                | Up: <i>Corynebacterium</i> , <i>Roseburia</i> , <i>Turicibacter</i> , Down: <i>Ruminococcus</i> , <i>Adlercreutzia</i> , <i>Dorea</i>                                                                        | Elevated hepatic iNOS, TNF                                                                                            | Associative         |                                               |
| 52 | Rat          | Aspartame + HFD / NC                     | (NC) Up: total bacteria, <i>Enterobacteriaceae</i> , <i>Clostridium leptum</i> , (HFD) Up: <i>Roseburia</i> spp., Down: Firmicutes/Bacteroidetes ratio                                                       | Impaired glucose and insulin sensitivity                                                                              | Associative         |                                               |
| 53 | Rat          | Splenda (sucralose-glucose-maltodextrin) | Down: total anaerobes, <i>Bifidobacterium</i> , <i>Lactobacillus</i> , <i>Bacteroides</i> , <i>Clostridium</i>                                                                                               | Weight gain                                                                                                           | Associative         |                                               |
| 54 | Mouse        | Increased omega-3 : omega-6 fatty        | Up: Proteobacteria, <i>Prevotella</i> , <i>Fusobacterium</i> , <i>Clostridium</i> cluster XI, SFB, Down: <i>Bifidobacterium</i> , <i>Akkermansia muciniphila</i> , <i>Lactobacillus</i> , <i>Clostridium</i> | Metabolic endotoxemia                                                                                                 | Causative (inverse) | Antibiotics, co-hosing experiments            |

|    |              |                             |                                                                                                             |                                                                               |             |                                              |
|----|--------------|-----------------------------|-------------------------------------------------------------------------------------------------------------|-------------------------------------------------------------------------------|-------------|----------------------------------------------|
|    |              | acids ratio                 | clusters IV and XIVA, <i>Enterococcus faecium</i>                                                           |                                                                               |             |                                              |
| 55 | Mouse        | Saturated fat               | Up: <i>Bacteroides, Turicibacter, Bilophila</i>                                                             | Weight gain, increased fasting insulin and glucose levels, insulin resistance | Causative   | KO models, FMT in GF mice, pathway inhibitor |
| 56 | Mouse        | Palmitate                   | Down: <i>Prevotellaceae, S24-7</i>                                                                          | EAE, decrease in SCFA                                                         | Causative   | FMT in GF mice, metabolite supplementation   |
| 57 | Human        | Saturated fat               | Up: <i>Anaerotruncus, Desulfovibrio</i> and <i>Coprobacillus</i>                                            | Frailty in elderly                                                            | Associative |                                              |
| 57 | Mouse        | Saturated fat               | Up: <i>Bilophila wadsworthia</i>                                                                            | Genetically-induced colitis                                                   | Associative |                                              |
| 58 | Mouse        | Linoleic acid               | Up: <i>Bacteroides/Prevotella, Akkermansia</i>                                                              | Elevated stomach leptin protein, elevated stomach gene expression             | Associative |                                              |
| 59 | Human, mouse | <i>L-carnitine</i>          | Various bacteria                                                                                            | Atherosclerosis                                                               | Causative   | Antibiotics, metabolite supplementation      |
| 60 | Mouse        | TMAO, choline               | Up: <i>Allobaculum</i> , Down: SFB, <i>Lachnospiraceae</i>                                                  | Platelet hyperreactivity, enhanced thrombosis                                 | Causative   | FMT in GF mice                               |
| 61 | Human        | Choline levels manipulation | Down: Gammaproteobacteria                                                                                   | Increase in liver fat                                                         | Associative |                                              |
| 62 | Mouse        | Low-nitrite/nitrate diet    | Up: Actinobacteria, Bifidobacteriales, Down: Betaproteobacteria, Burkholderiales, Bacillales (among others) | Metabolic syndrome                                                            | Associative |                                              |
| 63 | Mouse        | Vitamin D-deficient diet    | Up: Bacteroidetes                                                                                           | Severity of infectious and chemically-induced colitis                         | Associative |                                              |
| 64 | Human        | Vitamin D-deficient diet    | Up: <i>Prevotella</i> , Down: <i>Haemophilus, Veillonella</i>                                               | Increased LPS                                                                 | Associative |                                              |
| 65 | Mouse        | Vitamin D-deficient diet    | Up: Bacteroidetes, Firmicutes, Actinobacteria, Gammaproteobacteria                                          | Severity of infectious colitis                                                | Associative |                                              |

|    |       |                                                            |                                                                                                                                                         |                                                                                           |             |                                   |
|----|-------|------------------------------------------------------------|---------------------------------------------------------------------------------------------------------------------------------------------------------|-------------------------------------------------------------------------------------------|-------------|-----------------------------------|
| 66 | Mouse | Selenium-deficient diet                                    | <i>Coxsackievirus B3</i>                                                                                                                                | Myocarditis                                                                               | Associative |                                   |
| 67 | Mouse | Heme                                                       | Up: <i>Akkermansia muciniphila</i>                                                                                                                      | Differential expression of oncogenes, tumor suppressors, epithelial proliferation         | Causative   | Antibiotics                       |
| 68 | Mouse | Iron sulfate                                               | Up: <i>Bifidobacterium</i> , <i>Succinivibrio</i> , <i>Turicibacter</i> , <i>Clostridium</i> , Down: <i>Desulfovibrio</i> , <i>Bacteroides</i>          | Terminal ileitis                                                                          | Associative |                                   |
| 69 | Mouse | Elemental diet                                             | <i>Nippostrongylus brasiliensis</i> , <i>Giardia muris</i>                                                                                              | Exacerbated infection, mucosal damage                                                     | Associative |                                   |
| 70 | Mouse | Acesulfame-potassium                                       | Up: <i>Bacteroides</i> , <i>Anaerostipes</i> and <i>Sutterella</i>                                                                                      | Weight gain, increase in LPS synthesis genes, increase pyruvic acid, cholic acid in feces | Associative |                                   |
| 71 | Human | Long-stay care diet                                        | Various bacteria                                                                                                                                        | Frailty in elderly                                                                        | Associative |                                   |
| 72 | Human | Vegetable/fruit juice restricted diet                      | Up: Bacteroidetes, Cyanobacteria, Down: Firmicutes, Proteobacteria                                                                                      | Reduced body weight, increased plasma and urine nitric oxide                              | Associative |                                   |
| 73 | Rat   | Pterostilbene                                              | Down: Firmicutes, Up: <i>Akkermansia</i> , <i>Odoribacter</i>                                                                                           | Reduced weight gain, adiposity, insulin resistance and cholesterol                        | Associative |                                   |
| 74 | Human | Synbiotic (FOS/inulin mix, <i>Bifidobacterium longum</i> ) | Up: <i>Bifidobacterium longum</i>                                                                                                                       | Reduced sigmoidoscopy score, reduced inflammatory markers, reduced beta-defensins         | Associative |                                   |
| 75 | Human | Barley-kernel bread                                        | Up: <i>Prevotella copri</i>                                                                                                                             | Improved postprandial glucose metabolism                                                  | Causative   | GF colonized with causative agent |
| 76 | Human | Personally-tailored diet                                   | Up: <i>Roseburia inulinivorans</i> , <i>Eubacterium eligens</i> , <i>Bacteroides vulgatus</i> , <i>Alistipes putredinis</i> , Down: <i>Anaerostipes</i> | Improved glycemic response                                                                | Associative |                                   |



---

A list of prominent studies linking dietary practices, nutrient deprivation or supplementation or dietary patterns with members of the microbiota and an observed phenotype in the host. The column "Organism" displays the host which originally harboured the studied microbiota (can be different than the experimental animal in cases of gnotobiotic models). "Microbiota members" includes the major taxa which differed between the interventional group to control or before and after treatment, where "Up:" indicates taxa which were relatively more abundant or that increased following intervention, and "Down:" indicates taxa which were less abundant or that decreased following intervention. The column "Phenotype" usually refers to observed clinical features. "Causative / associative" indicates the nature of the link found between the diet and the microbiota to the phenotype (if an inverse correlation is found or if the phenotype is attenuated by the diet and the microbiota, the word "inverse" appears in brackets). "Methods of confirmation" are specified in case of a causative interactions. CRC, colorectal cancer; EAE, Experimental autoimmune encephalomyelitis; FFA, free-fatty acids; FMT, faecal microbiota transplantation; FOS, fructooligosaccharides; GF, germ-free; GTT, glucose tolerance test; HFD, high-fat diet; HFHSD, high-fat high-sugar diet; IGN, intestinal gluconeogenesis; IL, interleukin; iNOS, Inducible nitric oxide synthase; KO, knock-out; LPS, lipopolysaccharide; NAS, non-caloric artificial sweeteners; NC, normal chow; SCFA, short-chain fatty acids; TG, triglycerides; TMAO, trimethylamine oxide; TNF, tumor necrosis factor.

## References

1. Leone, V. *et al.* Effects of diurnal variation of gut microbes and high-fat feeding on host circadian clock function and metabolism. *Cell Host Microbe* **17**, 681–9 (2015).
2. Cani, P. D. *et al.* Changes in gut microbiota control metabolic endotoxemia-induced inflammation in high-fat diet-induced obesity and diabetes in mice. *Diabetes* **57**, 1470–1481 (2008).
3. Cani, P. D. *et al.* Metabolic endotoxemia initiates obesity and insulin resistance. *Diabetes* **56**, 1761–72 (2007)
4. Ussar, S. *et al.* Interactions between Gut Microbiota, Host Genetics and Diet Modulate the Predisposition to Obesity and Metabolic Syndrome. *Cell Metab.* **22**, 516–30 (2015)
5. Murphy, E. F. *et al.* Composition and energy harvesting capacity of the gut microbiota: relationship to diet, obesity and time in mouse models. *Gut* **59**, 1635–1642 (2010)

6. Kim, K. A., Gu, W., Lee, I. A., Joh, E. H. & Kim, D. H. High Fat Diet-Induced Gut Microbiota Exacerbates Inflammation and Obesity in Mice via the TLR4 Signaling Pathway 22. *PLoS.ONE.* **7**, e47713 (2012)
7. Hildebrandt, M. a *et al.* High-fat diet determines the composition of the murine gut microbiome independently of obesity. *Gastroenterology* **137**, 1716–24–2 (2009)
8. Perry, R. J. *et al.* Acetate mediates a microbiome–brain– $\beta$ -cell axis to promote metabolic syndrome. *Nature* **534**, 213–217 (2016)
9. Everard, A. *et al.* Cross-talk between *Akkermansia muciniphila* and intestinal epithelium controls diet-induced obesity. *Proc. Natl. Acad. Sci.* **110**, 9066–9071 (2013)
10. Cheng, L. *et al.* High fat diet exacerbates dextran sulfate sodium induced colitis through disturbing mucosal dendritic cell homeostasis. *Int. Immunopharmacol.* **40**, 1–10 (2016)
11. Ruan, J.-W. *et al.* Dual-specificity phosphatase 6 deficiency regulates gut microbiome and transcriptome response against diet-induced obesity in mice. *Nat. Microbiol.* **2**, 16220 (2016)
12. Myles, I. A. *et al.* Parental dietary fat intake alters offspring microbiome and immunity. *J. Immunol.* **191**, 3200–9 (2013)
13. Wankhade, U. D. *et al.* Enhanced offspring predisposition to steatohepatitis with maternal high-fat diet is associated with epigenetic and microbiome alterations. *PLoS One* **12**, e0175675 (2017)
14. Roopchand, D. E. *et al.* Dietary Polyphenols Promote Growth of the Gut Bacterium *Akkermansia muciniphila* and Attenuate High-Fat Diet–Induced Metabolic Syndrome. *Diabetes* **64**, 2847–2858 (2015)
15. Norris, G. H., Jiang, C., Ryan, J., Porter, C. M. & Blesso, C. N. Milk sphingomyelin improves lipid metabolism and alters gut microbiota in high fat diet-fed mice. *J. Nutr. Biochem.* **30**, 93–101 (2016)
16. Cani, P. D. *et al.* Selective increases of bifidobacteria in gut microflora improve high-fat-diet-induced diabetes in mice through a mechanism associated with endotoxaemia. *Diabetologia* **50**, 2374–2383 (2007)

17. Serino, M. et al. Metabolic adaptation to a high-fat diet is associated with a change in the gut microbiota. *Gut* **61**, 543–553 (2012).
18. Neyrinck, A. M. et al. Prebiotic effects of wheat arabinoxylan related to the increase in bifidobacteria, Roseburia and Bacteroides/Prevotella in diet-induced obese mice. *PLoS One* **6**, e20944 (2011)
19. Thaiss, C. A. et al. Transkingdom control of microbiota diurnal oscillations promotes metabolic homeostasis. *Cell* **159**, 514–529 (2014)
20. Zarrinpar, A., Chaix, A., Yooseph, S. & Panda, S. Diet and feeding pattern affect the diurnal dynamics of the gut microbiome. *Cell Metab.* **20**, 1006–1017 (2014)
21. Mukherji, A., Kobiita, A., Ye, T. & Chambon, P. Homeostasis in intestinal epithelium is orchestrated by the circadian clock and microbiota cues transduced by TLRs. *Cell* **153**, 812–27 (2013)
22. Su, D. et al. Vitamin D Signaling through Induction of Paneth Cell Defensins Maintains Gut Microbiota and Improves Metabolic Disorders and Hepatic Steatosis in Animal Models. *Front. Physiol.* **7**, 498 (2016)
23. Turnbaugh, P. J. et al. The effect of diet on the human gut microbiome: a metagenomic analysis in humanized gnotobiotic mice. *Sci. Transl. Med.* **1**, 6ra14 (2009)
24. Carmody, R. N. et al. Diet Dominates Host Genotype in Shaping the Murine Gut Microbiota. *Cell Host Microbe* **17**, 72–84 (2014)
25. Lukens, J. R. et al. Dietary modulation of the microbiome affects autoinflammatory disease. *Nature* **516**, 246–249 (2014)
26. Vadder, F. De et al. Microbiota-Generated Metabolites Promote Metabolic Benefits via Gut-Brain Neural Circuits. *Cell* **156**, 1–13 (2014).
27. Anhe, F. F. et al. A polyphenol-rich cranberry extract protects from diet-induced obesity, insulin resistance and intestinal inflammation in association with increased *Akkermansia* spp. population in the gut microbiota of mice. *Gut* **64**, 872–883 (2015).
28. Turnbaugh, P. J., Backhed, F., Fulton, L. & Gordon, J. I. Diet-Induced Obesity Is Linked to Marked but Reversible Alterations in the Mouse Distal Gut Microbiome. *Cell Host Microbe* **3**, 213–223 (2008).

29. Dao, M. C. *et al.* *Akkermansia muciniphila* and improved metabolic health during a dietary intervention in obesity: relationship with gut microbiome richness and ecology. *Gut* **65**, 426–436 (2016).
30. Nadal, I. *et al.* Shifts in clostridia, bacteroides and immunoglobulin-coating fecal bacteria associated with weight loss in obese adolescents. *Int. J. Obes. (Lond)*. **33**, 758–67 (2009).
31. Santacruz, A. *et al.* Interplay between weight loss and gut microbiota composition in overweight adolescents. *Obesity (Silver Spring)*. **17**, 1906–15 (2009).
32. Ruiz, A. *et al.* One-year calorie restriction impacts gut microbial composition but not its metabolic performance in obese adolescents. *Environ. Microbiol.* **19**, 1536–1551 (2017).
33. Zhang, C. *et al.* Structural modulation of gut microbiota in life-long calorie-restricted mice. *Nat. Commun.* **4**, 2163 (2013).
34. Trompette, A. *et al.* Gut microbiota metabolism of dietary fiber influences allergic airway disease and hematopoiesis. *Nat. Med.* **20**, 159–166 (2014).
35. Macia, L. *et al.* Metabolite-sensing receptors GPR43 and GPR109A facilitate dietary fibre-induced gut homeostasis through regulation of the inflammasome. *Nat. Commun.* **6**, 6734 (2015).
36. Jeffery, I. B., Lynch, D. B. & O'Toole, P. W. Composition and temporal stability of the gut microbiota in older persons. *ISME J.* **10**, 170–82 (2016).
37. Li, Y. *et al.* Exogenous stimuli maintain intraepithelial lymphocytes via aryl hydrocarbon receptor activation. *Cell* **147**, 629–40 (2011).
38. Desai, M. S. *et al.* A Dietary Fiber-Deprived Gut Microbiota Degrades the Colonic Mucus Barrier and Enhances Pathogen Susceptibility. *Cell* **167**, 1339–1353.e21 (2016).
39. Thaiss, C. A. *et al.* Persistent microbiome alterations modulate the rate of post-dieting weight regain. *Nature* **540**, 544–551 (2016).

40. Martínez, I. et al. Gut microbiome composition is linked to whole grain-induced immunological improvements. *ISME J.* **7**, 269–280 (2013).
41. Belcheva, A. et al. Gut Microbial Metabolism Drives Transformation of Msh2-Deficient Colon Epithelial Cells. *Cell* **158**, 288–299 (2012).
42. Fava, F. et al. The type and quantity of dietary fat and carbohydrate alter faecal microbiome and short-chain fatty acid excretion in a metabolic syndrome ‘at-risk’ population. *Int. J. Obes.* **37**, 216–223 (2013).
43. Reyes, A. et al. Gut DNA viromes of Malawian twins discordant for severe acute malnutrition. *Proc. Natl. Acad. Sci.* **112**, 11941–11946 (2015).
44. Charbonneau, M. R. et al. Sialylated Milk Oligosaccharides Promote Microbiota-Dependent Growth in Models of Infant Undernutrition. *Cell* **164**, 859–71 (2016).
45. Smith, M. I. et al. Gut Microbiomes of Malawian Twin Pairs Discordant for Kwashiorkor. *Science.* **339**, 548–554 (2013).
46. Shukla, G., Bhatia, R. & Sharma, A. Prebiotic inulin supplementation modulates the immune response and restores gut morphology in *Giardia duodenalis*-infected malnourished mice. *Parasitol. Res.* **115**, 4189–4198 (2016).
47. Chassaing, B., Van de Wiele, T., De Bodt, J., Marzorati, M. & Gewirtz, A. T. Dietary emulsifiers directly alter human microbiota composition and gene expression ex vivo potentiating intestinal inflammation. *Gut* gutjnl-2016-313099 (2017). doi:10.1136/gutjnl-2016-313099
48. Chassaing, B. et al. Dietary emulsifiers impact the mouse gut microbiota promoting colitis and metabolic syndrome. *Nature* **519**, 92–96 (2015).
49. Suez, J. et al. Artificial sweeteners induce glucose intolerance by altering the gut microbiota. *Nature* **514**, 181–6 (2014).
50. Uebanso, T. et al. Effects of Low-Dose Non-Caloric Sweetener Consumption on Gut Microbiota in Mice. *Nutrients* **9**, 560 (2017).

51. Bian, X. et al. Saccharin induced liver inflammation in mice by altering the gut microbiota and its metabolic functions. *Food Chem. Toxicol.* (2017). doi:10.1016/j.fct.2017.04.045
52. Palmnäs, M. S. A. et al. Low-dose aspartame consumption differentially affects gut microbiota-host metabolic interactions in the diet-induced obese rat. *PLoS One* **9**, e109841 (2014).
53. Abou-Donia, M. B., El-Masry, E. M., Abdel-Rahman, A. A., McLendon, R. E. & Schiffman, S. S. Splenda Alters Gut Microflora and Increases Intestinal P-Glycoprotein and Cytochrome P-450 in Male Rats. *J. Toxicol. Environ. Heal. Part A* **71**, 1415–1429 (2008).
54. Kaliannan, K., Wang, B., Li, X.-Y., Kim, K.-J. & Kang, J. X. A host-microbiome interaction mediates the opposing effects of omega-6 and omega-3 fatty acids on metabolic endotoxemia. *Sci. Rep.* **5**, 11276 (2015).
55. Caesar, R., Tremaroli, V., Kovatcheva-Datchary, P., Cani, P. D. & Bäckhed, F. Crosstalk between gut microbiota and dietary lipids aggravates WAT inflammation through TLR signaling. *Cell Metab.* **22**, 658–668 (2015).
56. Haghikia, A. et al. Dietary Fatty Acids Directly Impact Central Nervous System Autoimmunity via the Small Intestine. *Immunity* **43**, 817–829 (2015).
36. Jeffery, I. B., Lynch, D. B. & O'Toole, P. W. Composition and temporal stability of the gut microbiota in older persons. *ISME J.* **10**, 170–82 (2016).
57. Devkota, S. et al. Dietary-fat-induced taurocholic acid promotes pathobiont expansion and colitis in *Il10<sup>-/-</sup>* mice. *Nature* (2012). doi:10.1038/nature11225
58. Chaplin, A., Parra, P., Serra, F. & Palou, A. Conjugated Linoleic Acid Supplementation under a High-Fat Diet Modulates Stomach Protein Expression and Intestinal Microbiota in Adult Mice. *PLoS One* **10**, e0125091 (2015).
59. Koeth, R. A. et al. Intestinal microbiota metabolism of l-carnitine, a nutrient in red meat, promotes atherosclerosis. *Nat. Med.* **19**, 576–585 (2013).

60. Zhu, W. *et al.* Gut microbial metabolite TMAO enhances platelet hyperreactivity and thrombosis risk. *Cell* **165**, 111–124 (2016).
61. Spencer, M. D. *et al.* Association between composition of the human gastrointestinal microbiome and development of fatty liver with choline deficiency. *Gastroenterology* **140**, 976–86 (2011).
62. Kina-Tanada, M. *et al.* Long-term dietary nitrite and nitrate deficiency causes the metabolic syndrome, endothelial dysfunction and cardiovascular death in mice. *Diabetologia* **60**, 1138–1151 (2017).
63. Assa, A. *et al.* Vitamin D deficiency predisposes to adherent-invasive *Escherichia coli*-induced barrier dysfunction and experimental colonic injury. *Inflamm. Bowel Dis.* **21**, 297–306 (2015).
64. Luthold, R. V, Fernandes, G. R., Franco-de-Moraes, A. C., Folchetti, L. G. D. & Ferreira, S. R. G. Gut microbiota interactions with the immunomodulatory role of vitamin D in normal individuals. *Metabolism.* **69**, 76–86 (2017).
65. Assa, A. *et al.* Vitamin D deficiency promotes epithelial barrier dysfunction and intestinal inflammation. *J. Infect. Dis.* **210**, 1296–305 (2014).
66. Beck, M. A., Shi, Q., Morris, V. C. & Levander, O. A. Rapid genomic evolution of a non-virulent coxsackievirus B3 in selenium-deficient mice results in selection of identical virulent isolates. *Nat. Med.* **1**, 433–6 (1995).
67. Ijssennagger, N. *et al.* Gut microbiota facilitates dietary heme-induced epithelial hyperproliferation by opening the mucus barrier in colon. *Proc. Natl. Acad. Sci.* **112**, 10038–10043 (2015).
68. Werner, T. *et al.* Depletion of luminal iron alters the gut microbiota and prevents Crohn's disease-like ileitis. *Gut* **60**, 325–33 (2011).
69. Ferguson, A., Logan, R. F. & MacDonald, T. T. Increased mucosal damage during parasite infection in mice fed an elemental diet. *Gut* **21**, 37–43 (1980).
70. Bian, X. *et al.* The artificial sweetener acesulfame potassium affects the gut microbiome and body weight gain in CD-1 mice. *PLoS One* **12**, e0178426 (2017).

71. Claesson, M. J. *et al.* Gut microbiota composition correlates with diet and health in the elderly. *Nature* **488**, 178–84 (2012).
72. Henning, S. M. *et al.* Health benefit of vegetable/fruit juice-based diet: Role of microbiome. *Sci. Rep.* **7**, 2167 (2017).
73. Etxeberria, U. *et al.* Pterostilbene-induced changes in gut microbiota composition in relation to obesity. *Mol. Nutr. Food Res.* **61**, 1500906 (2017).
74. Furrie, E. *et al.* Synbiotic therapy (Bifidobacterium longum/Synergy 1) initiates resolution of inflammation in patients with active ulcerative colitis: a randomised controlled pilot trial. *Gut* **54**, 242–9 (2005).
75. Kovatcheva-Datchary, P. *et al.* Dietary Fiber-Induced Improvement in Glucose Metabolism Is Associated with Increased Abundance of *Prevotella*. *Cell Metab.* **22**, 971–82 (2015).
76. Zeevi, D. *et al.* Personalized Nutrition by Prediction of Glycemic Responses. *Cell* **163**, 1079–94 (2015).
